# Supplementary material for: Infodemiologists Beware: Recent Changes to the Google Health Trends API Result in Incomparable Data as of 1 January 2022
Source: MDPI journal article supplement (doi:10.3390/ijerph192215396), 2022-11-21

**Table S1.** List of searched terms included in this investigation. It should be noted that the presented supplementary figures' numbers do not correspond with the order that the keywords are presented here.

| Freebase ID /<br>Google Knowledge Graph Identifier | English Term                 |
|----------------------------------------------------|------------------------------|
| /m/0pzy                                            | Acacia                       |
| /m/02015n                                          | Acetazolamide                |
| /m/0bsk8                                           | Acetic acid                  |
| /m/0dv67                                           | Acetylcholine                |
| /m/01_ds3                                          | Acetylcysteine               |
| /m/0t2t                                            | Acetylene                    |
| /m/02xbjr                                          | Aciclovir                    |
| /m/02378v                                          | Activated carbon             |
| /g/11l0qhr92                                       | Ad26.COVS2.S                 |
| /m/03qkby                                          | Adapalene                    |
| /g/12384rxk                                        | Adrenaline                   |
| /m/0fx47                                           | Adrenocorticotrophic hormone |
| /m/01sbwk                                          | Agaricus bisporus            |
| /m/02kbv4h                                         | Aldosterone                  |
| /m/03n1kq                                          | Alkaline phosphatase         |
| /m/01ls3h                                          | Allopurinol                  |
| /m/01k9cw                                          | Alprazolam                   |
| /m/027vj2v                                         | Aluminium                    |
| /m/04wrbh                                          | Aluminium chloride           |
| /m/011w2f                                          | Aluminium oxide              |
| /m/0pbc                                            | Amber                        |
| /m/0m_j                                            | Amino acid                   |
| /m/02sff3                                          | Amitriptyline                |
| /m/02_0mv                                          | Amlodipine                   |
| /m/0p6_                                            | Ammonia                      |
| /m/01qwgry                                         | Ammonium chloride            |
| /m/011z0                                           | Amoxicillin                  |
| /m/01rr9y                                          | Aniline                      |
| /m/027s2zq                                         | Antimony                     |
| /m/0k8z                                            | Apple                        |
| /m/05253_m                                         | Apple cider vinegar          |
| /m/0fnfy                                           | Apricot                      |
| /m/0b1p9p                                          | Argan oil                    |
| /m/0y44                                            | Ascorbic acid                |
| /m/0cjs7                                           | Asparagus                    |
| /m/0qkc                                            | Aspirin                      |
| /m/034yzx                                          | Atenolol                     |
| /m/02y_rs                                          | Atorvastatin                 |
| /m/012fbv                                          | Atropine                     |
| /m/01645p                                          | Avocado                      |
| /m/032n3z                                          | Azithromycin                 |
| /m/09qck                                           | Banana                       |
| /m/09gtx                                           | Barley                       |
| /m/01yt8c                                          | Basil                        |
| /m/01bzn                                           | BCG vaccine                  |
| /m/01fp9                                           | Bean                         |

---

|               |                   |
|---------------|-------------------|
| /m/0971v      | Beef              |
| /m/0bxq8      | Beeswax           |
| /m/0jg57      | Bell pepper       |
| /m/01fr51     | Bentonite         |
| /m/01bbg      | Benzoic acid      |
| /m/03h2f_     | Benzoyl peroxide  |
| /m/057xmt0    | Benzylpenicillin  |
| /m/057fff     | Betamethasone     |
| /m/0f4ml      | Biotin            |
| /m/0994n3     | Bisoprolol        |
| /m/0139zp     | Black pepper      |
| /m/0ftbs      | Blueberry         |
| /m/0hdcp      | Borax             |
| /m/0hd8m      | Boric acid        |
| /m/025svlc    | Boron             |
| /g/120zt_4k   | Botulinum toxin   |
| /m/09tw9b     | Broccoli          |
| /m/025tksd    | Cadmium           |
| /m/01_7l      | Caffeine          |
| /m/025tkqy    | Calcium           |
| /m/0c5pb      | Calcium carbonate |
| /m/012w7x     | Calcium oxide     |
| /m/04klcx     | Cannabidiol       |
| /m/01_y8      | Carbamazepine     |
| /m/01s7k      | Carbon dioxide    |
| /m/01v1v      | Carbon monoxide   |
| /g/11bc5yhfnk | Carrot            |
| /m/0m7j1      | Casein            |
| /m/0h259      | Cashew            |
| /m/0174xf     | Castor oil        |
| /m/0cqrl      | Catfish           |
| /m/03x2w7     | Ceftriaxone       |
| /m/01xj_      | Celery            |
| /m/03t7zn     | Cetirizine        |
| /m/011bc8hg   | Chamomile         |
| /m/0f8sw      | Cherry            |
| /m/09b5t      | Chicken           |
| /m/0fqtt      | Chickpea          |
| /m/01whr      | Chloramphenicol   |
| /m/03n352     | Chlorhexidine     |
| /m/0hjfy      | Chloride          |
| /m/025tkqp    | Chlorine          |
| /m/0l80n      | Chloroform        |
| /m/05c7gk     | Chloroquine       |
| /m/0133fz     | Chlorpromazine    |
| /m/01w_3      | Cholesterol       |
| /m/025tkr6    | Chromium          |
| /m/0f0ch      | Cinnamon          |
| /m/01zfw      | Ciprofloxacin     |
| /m/0f7gf      | Citric acid       |
| /m/02z4qr     | Clindamycin       |

---

---

|             |                                 |
|-------------|---------------------------------|
| /m/044r6z   | Clomifene                       |
| /m/035wxl   | Clonazepam                      |
| /m/02svfj   | Clopidogrel                     |
| /m/05l1rk   | Clotrimazole                    |
| /g/121hrbw_ | Clove                           |
| /m/0f4k5    | Cobalamin                       |
| /m/025tkrf  | Cobalt                          |
| /m/0256b    | Cocaine                         |
| /m/03mjm_   | Cocoa butter                    |
| /m/0djtd    | Coconut                         |
| /m/01jszz   | Coconut oil                     |
| /m/01f4g6   | Cod liver oil                   |
| /m/0256v    | Codeine                         |
| /m/0p3rn    | Coenzyme Q10                    |
| /m/05bzrs   | Coffee bean                     |
| /m/01_yv2   | Colchicine                      |
| /m/025rsfk  | Copper                          |
| /g/120vb81q | Cotton                          |
| /m/020dp    | Cranberry                       |
| /m/01wyhy   | Creatine                        |
| /m/0hdqh    | Creatinine                      |
| /m/015x4r   | Cucumber                        |
| /m/01qs2    | Cumin                           |
| /m/02x9wcz  | Dapagliflozin                   |
| /m/01x1z5   | Dexamethasone                   |
| /m/01j3v_   | Diazepam                        |
| /m/01_94h   | Diclofenac                      |
| /m/01xc5b   | Digoxin                         |
| /m/0256qn   | Diphenhydramine                 |
| /m/0c_3s    | Dopamine                        |
| /m/030md9   | Doxycycline                     |
| /m/033cnk   | Egg                             |
| /m/01zvtl   | Egg white                       |
| /m/0cdk2    | Eggplant                        |
| /m/018_cj   | Ephedrine                       |
| /m/02r51    | Erythromycin                    |
| /m/01fwr3   | Erythropoietin                  |
| /m/039ztp   | Esomeprazole                    |
| /m/01h2ty   | Estradiol                       |
| /m/02qvz    | Ethanol                         |
| /m/04khtxp  | Ethylenediaminetetraacetic acid |
| /m/017dqv   | Fennel                          |
| /m/011w3r   | Fentanyl                        |
| /m/043nyj   | Fig                             |
| /m/04lr99   | Finasteride                     |
| /m/03y0gb   | Fish oil                        |
| /m/03dwr5   | Fluconazole                     |
| /m/025rqc3  | Fluorine                        |
| /m/0bqx0    | Fluoxetine                      |
| /m/02kb_jm  | Folate                          |
| /m/0h3r1    | Formaldehyde                    |

---

---

|               |                              |
|---------------|------------------------------|
| /m/0d9t0      | Fructose                     |
| /m/02fb0h     | Furosemide                   |
| /m/02fvfb     | Gabapentin                   |
| /m/0dbrl      | Garlic                       |
| /m/03fz3      | Gelatin                      |
| /m/01lrb      | Gentamicin                   |
| /g/121d6gs3   | Ginger                       |
| /m/0htd3      | Ginkgo                       |
| /m/029x39     | Ginseng                      |
| /m/079695     | Glibenclamide                |
| /m/0112q7     | Glucagon                     |
| /m/02kb_m_    | Glucose                      |
| /m/0k_xf      | Glutathione                  |
| /m/01781c     | Glycerol                     |
| /m/02kc008    | Glycine                      |
| /m/075w2f     | Glycolic acid                |
| /m/01q_vm     | Glyphosate                   |
| /g/122hcm0p   | Goat milk                    |
| /m/025rs2z    | Gold                         |
| /m/0dbvp      | Goose                        |
| /m/0388q      | Grape                        |
| /m/0hqkz      | Grapefruit                   |
| /m/0hqvklw    | Growth hormone               |
| /m/0199v_     | Haloperidol                  |
| /m/06wcblr    | Hazelnut                     |
| /m/025rt79    | Helium                       |
| /m/01jjpv     | Heparin                      |
| /m/02z0_x8    | Hepatitis B vaccine          |
| /m/03n5b      | Heroin                       |
| /m/0d7j9      | Herring                      |
| /m/0238z7     | Histamine                    |
| /g/11fj7lyvsb | Honey                        |
| /m/03qjz      | Hops                         |
| /m/0cdkl      | Horseradish                  |
| /m/01rtx2     | Human chorionic gonadotropin |
| /m/04ldlf     | Hyaluronic acid              |
| /m/0dc0x      | Hydrochloric acid            |
| /m/02nsfz     | Hydrochlorothiazide          |
| /g/11c53146q3 | Hydrocortisone               |
| /m/02h9byz    | Hydrogen                     |
| /m/03q_p      | Hydrogen peroxide            |
| /m/05pqnv     | Hydroquinone                 |
| /m/03km2      | Hydroxide                    |
| /m/071ws0     | Hydroxychloroquine           |
| /m/03jdr1     | Hypochlorite                 |
| /m/014d3g     | Ibuprofen                    |
| /m/03ztdf     | Imipramine                   |
| /m/02dpgh     | Indole                       |
| /m/04h8mb     | Indomethacin                 |
| /m/02kyfb     | Iodide                       |
| /m/025rw19    | Iron                         |

---

---

|            |                            |
|------------|----------------------------|
| /m/01fmj4  | Iron(III) oxide            |
| /m/03zd_   | Isopropyl alcohol          |
| /m/01hgfy  | Isotretinoin               |
| /m/047j8m  | Ivermectin                 |
| /m/081mv8  | Jojoba oil                 |
| /m/04b5r   | Ketamine                   |
| /m/03bxlz  | Ketoconazole               |
| /m/04f8p   | Kiwifruit                  |
| /m/0176jz  | Lactic acid                |
| /m/04qlf   | Lactose                    |
| /m/03b15z  | Lamivudine                 |
| /m/01zww4  | Lamotrigine                |
| /m/02lj4d  | Lecithin                   |
| /m/09k_b   | Lemon                      |
| /m/017kh0  | Lentil                     |
| /m/08924w  | Letrozole                  |
| /m/0fqlj   | Lettuce                    |
| /m/02mx2z  | Levofloxacin               |
| /m/031zs3  | Levonorgestrel             |
| /m/05h3j6  | Levothyroxine              |
| /m/01rml9  | Lidocaine                  |
| /m/01k_hc  | Liquorice                  |
| /m/0cjq5   | Lobsters                   |
| /m/01qydv  | Loperamide                 |
| /m/0dgq98  | Lopinavir                  |
| /m/025s3l  | Loratadine                 |
| /m/072klj  | Losartan                   |
| /m/01kysw  | Luteinizing hormone        |
| /m/04g9r   | Lysergic acid diethylamide |
| /m/0h1vz   | Lysine                     |
| /m/025s0s0 | Magnesium                  |
| /m/02q788  | Magnesium chloride         |
| /m/01bfyf  | Magnesium hydroxide        |
| /m/015jzg  | Magnesium oxide            |
| /m/01kmqg  | Magnesium sulfate          |
| /m/01f5cb  | Maltose                    |
| /m/025s0zp | Manganese                  |
| /m/03zf_l  | Mannitol                   |
| /m/01pxjm  | Melatonin                  |
| /m/01v03x  | Menthol                    |
| /m/01lmkt  | Metformin                  |
| /m/0gt5b   | Methamphetamine            |
| /m/04ydh   | Methane                    |
| /m/01q2jc  | Methotrexate               |
| /m/01jmw4  | Methylene blue             |
| /m/01d65r  | Methylphenidate            |
| /m/05zwj8  | Methylprednisolone         |
| /m/021xx2  | Metoclopramide             |
| /m/01trbt  | Metronidazole              |
| /m/03npzj  | Miconazole                 |
| /m/02_7lx  | Midazolam                  |

---

---

|            |                     |
|------------|---------------------|
| /m/018svj  | Mifepristone        |
| /m/04zpv   | Milk                |
| /m/073ynx  | Milk thistle        |
| /m/01f3_7  | Mineral oil         |
| /m/027hm4  | Minoxidil           |
| /m/055pr   | Morphine            |
| /m/016gq4  | Morus alba          |
| /m/019pht  | Mustard seed        |
| /m/0n_fl   | Myrrh               |
| /m/09gvd   | Niacin              |
| /m/025s5r7 | Nicotinamide        |
| /m/09jrx   | Nicotine            |
| /m/035bjg  | Nifedipine          |
| /m/05d92   | Nitrate             |
| /m/05fmf   | Nitric acid         |
| /m/01j5q2  | Nitric oxide        |
| /m/025s4ld | Nitrogen            |
| /m/05dkv   | Nitroglycerin       |
| /m/09bml   | Nitrous oxide       |
| /m/09lnn   | Nutmeg              |
| /m/0cl2v   | Oat                 |
| /m/025s18p | Okra                |
| /m/05ml4   | Olive oil           |
| /m/05nkr   | Omega 3             |
| /m/02gbr5  | Omeprazole          |
| /m/04b72x  | Ondansetron         |
| /m/0dj75   | Onion               |
| /m/05pg4   | Opium               |
| /m/05kw_   | Oregano             |
| /m/025s6bf | Oxygen              |
| /m/02n6zm  | Oxytetracycline     |
| /m/01gfsk  | Oxytocin            |
| /m/0_cp5   | Oyster              |
| /m/025s7xf | Palladium           |
| /m/0fsx5   | Palm oil            |
| /m/0g4fr   | Papaya              |
| /m/0svg9   | Paprika             |
| /m/0lbt3   | Paracetamol         |
| /m/0264dt  | Parathyroid hormone |
| /m/05s28   | Parsley             |
| /m/0dj6p   | Peach               |
| /m/0fg0m   | Peanut              |
| /m/061_f   | Pear                |
| /m/05s38   | Peppermint          |
| /m/016nb4  | Pepsin              |
| /m/02x3hw  | Pethidine           |
| /m/01nxyd  | Petroleum jelly     |
| /m/05dr2v  | Phenobarbital       |
| /m/0602p   | Phenol              |
| /m/01km9r  | Phenolphthalein     |
| /m/0cyvn   | Phenytoin           |

---

---

|               |                        |
|---------------|------------------------|
| /m/019s9m     | Phosphoric acid        |
| /m/025s7x6    | Phosphorus             |
| /m/0fp6w      | Pineapple              |
| /m/0b3lj      | Pistachio              |
| /m/025s7y2    | Platinum               |
| /g/120p4gwp   | Plum                   |
| /m/01b90_     | Polio vaccine          |
| /m/071vkz     | Polylactic acid        |
| /m/0jwn_      | Pomegranate            |
| /m/0frq6      | Pork                   |
| /m/025s7j4    | Potassium              |
| /m/01j604     | Potassium hydroxide    |
| /m/03z9vp     | Potassium iodide       |
| /m/0h5p_      | Potassium nitrate      |
| /m/02fwyz     | Potassium permanganate |
| /g/120j31xn   | Potato                 |
| /m/02yzx9     | Prednisolone           |
| /m/06yvct     | Pregabalin             |
| /g/1215jb2v   | Progesterone           |
| /m/09pbb      | Proline                |
| /m/03xm_b     | Promethazine           |
| /m/019dfq     | Propranolol            |
| /m/0mzgk      | Prostaglandin          |
| /m/0hqw_      | Pseudoephedrine        |
| /m/05zsy      | Pumpkin                |
| /m/04h5y5     | Pyridoxine             |
| /m/09dz_d     | Pyrimethamine          |
| /m/0l04c      | Pyruvic acid           |
| /m/06b6w      | Quinine                |
| /m/06mf6      | Rabbit                 |
| /g/120jqr76   | Radish                 |
| /m/04nl3c     | Ranitidine             |
| /m/01pd2g     | Raspberry              |
| /g/11csqg56b7 | Remdesivir             |
| /m/06jry      | Riboflavin             |
| /m/09759      | Rice                   |
| /m/03qsl9     | Rifampicin             |
| /m/03l19k     | Ritonavir              |
| /m/09g6_4     | Rivaroxaban            |
| /m/06cd7      | Rosemary               |
| /m/02z705     | Rosuvastatin           |
| /m/02ck8_     | Salbutamol             |
| /g/120_g7k9   | Salicylic acid         |
| /m/075pc      | Scopolamine            |
| /m/01hm70     | Sea salt               |
| /m/073z8      | Serotonin              |
| /m/0136_g     | Sertraline             |
| /m/04vp3y     | Shea butter            |
| /m/0ll1f78    | Shrimp                 |
| /m/07_71      | Sildenafil             |
| /m/0bylh      | Silicon dioxide        |

---

---

|             |                      |
|-------------|----------------------|
| /m/025sf8x  | Silver               |
| /m/01h2wm   | Silver nitrate       |
| /m/014dn0   | Sodium bicarbonate   |
| /m/014dnj   | Sodium carbonate     |
| /m/0ksgj    | Sodium chloride      |
| /m/0fw77    | Sodium hydroxide     |
| /m/01cfyd   | Sodium nitrate       |
| /m/03clt1   | Sodium sulfate       |
| /m/0gyv9    | Soybean              |
| /m/016rh7   | Spinach              |
| /m/036mpc   | Spironolactone       |
| /m/0dv6r    | Squash               |
| /m/06x3w    | Starch               |
| /m/07fbm7   | Strawberry           |
| /m/0fkjv    | Sugarcane            |
| /m/0lk81    | Sulfate              |
| /m/0dfwj    | Sulfur dioxide       |
| /m/077lr    | Sulfuric acid        |
| /m/08ct4m   | Sunflower oil        |
| /m/0g0y_    | Sunflower seed       |
| /m/0dm32    | Sweet potato         |
| /m/0dcfv    | Table sugar          |
| /m/021rl7   | Tadalafil            |
| /m/07qps    | Talc                 |
| /m/04nv0k   | Tamoxifen            |
| /m/08f4cp   | Tamsulosin           |
| /m/0gs2h    | Tannin               |
| /m/0gll6    | Taurine              |
| /m/02_863   | Tea tree oil         |
| /m/048xtq   | Terbinafine          |
| /m/07m9q    | Testosterone         |
| /m/07jvd    | Tetracycline         |
| /m/0gjwh    | Tetrahydrocannabinol |
| /m/0gzk2    | Theophylline         |
| /m/07hnp    | Thiamine             |
| /m/025sk56  | Titanium             |
| /m/027yz2q  | Tocilizumab          |
| /m/07k6_    | Toluene              |
| /m/07j87    | Tomato               |
| /m/01l6z8   | Tramadol             |
| /m/069sqv   | Tranexamic acid      |
| /m/02zcy0   | Tretinoin            |
| /m/07jw9    | Trypsin              |
| /g/1214fwq8 | Turmeric             |
| /m/0cl46    | Turnip               |
| /m/07sy1    | Urea                 |
| /m/07syk    | Uric acid            |
| /m/09g33    | Valerian             |
| /m/079bqt   | Valsartan            |
| /m/07_rn    | Vanilla              |
| /m/01gfs2   | Vasopressin          |

---



---

|            |              |
|------------|--------------|
| /m/0f4l5   | Vitamin A    |
| /m/07zqy   | Vitamin C    |
| /m/0f4jp   | Vitamin D    |
| /m/03bwyyc | Vitamin E    |
| /m/07z_g   | Vitamin K    |
| /m/01jjmt  | Warfarin     |
| /m/0838f   | Water        |
| /m/02d9p2  | Watercress   |
| /m/0kpqd   | Watermelon   |
| /m/09696   | Wheat        |
| /m/025sqf  | Xenon        |
| /m/088lm   | Yeast        |
| /m/02dmz4  | Yolk         |
| /m/01bqth  | Zidovudine   |
| /m/025sqz8 | Zinc         |
| /m/02kgj6  | Zinc oxide   |
| /m/02hsj4  | Zinc sulfate |
| /m/01_2s3  | Zolpidem     |
| /m/01bqth  | Zidovudine   |
| /m/025sqz8 | Zinc         |
| /m/02kgj6  | Zinc oxide   |

---

## Supplementary Email S1: Email received from Google regarding changes to the Google Health Trends API

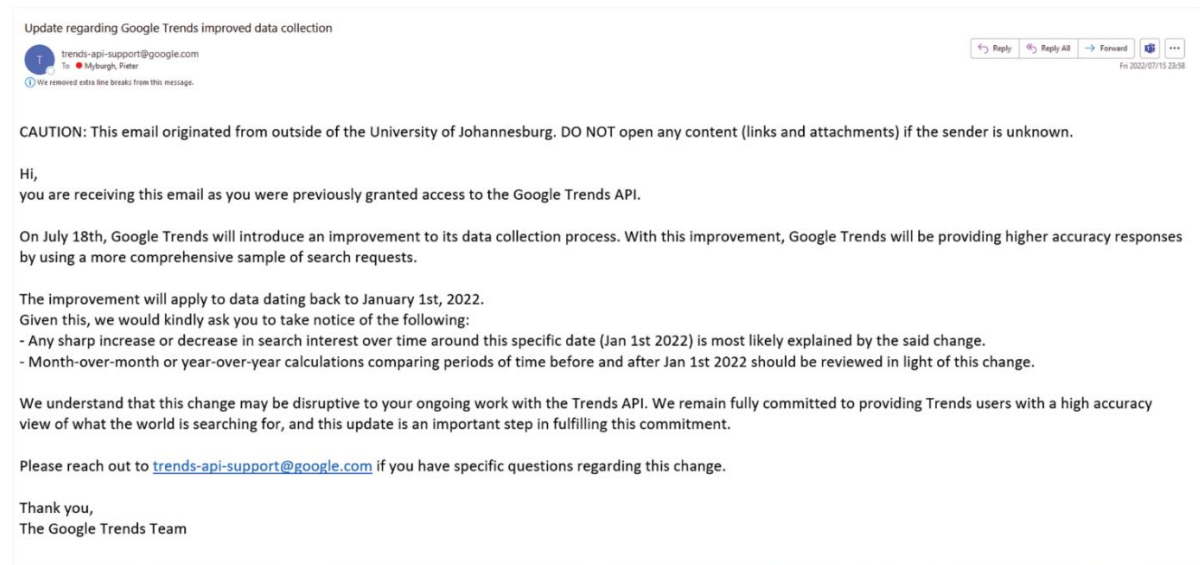

Supplement: s1 [file s1]
